# Supplementary material
Source: PubMed Central journal article supplement (PMC3051019)

# Supplemental Figures

## Figure S1

**a**

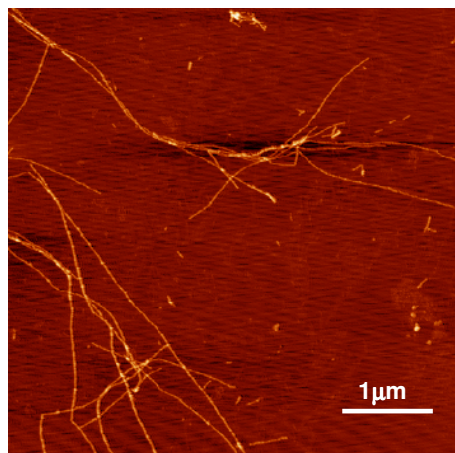

**b**

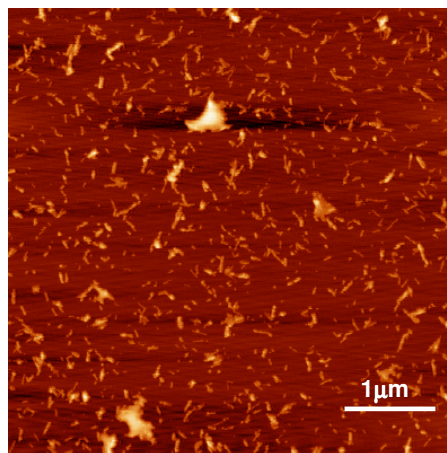

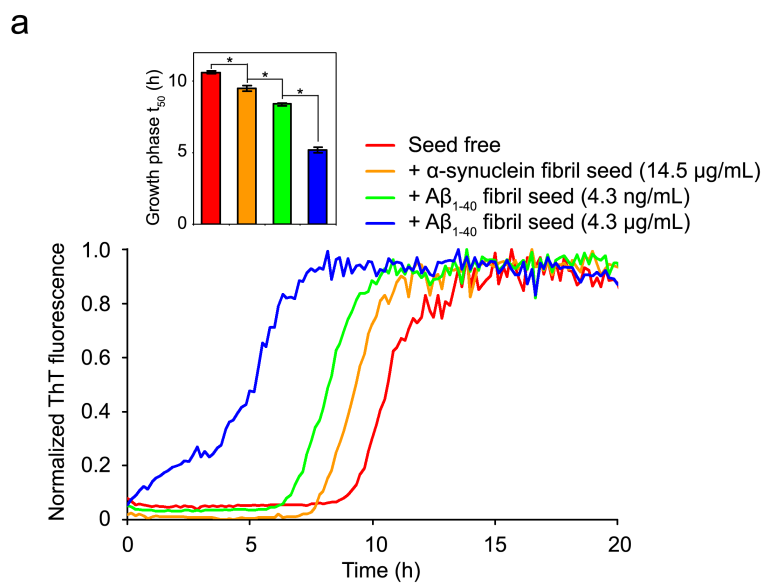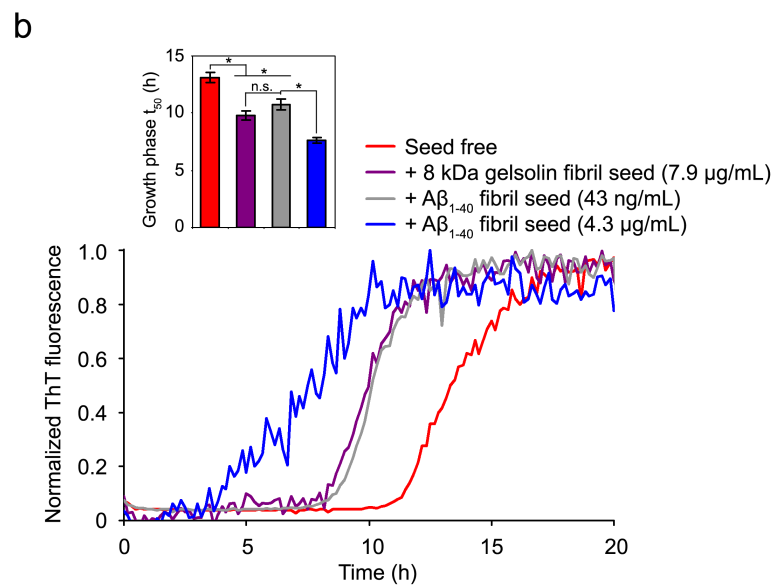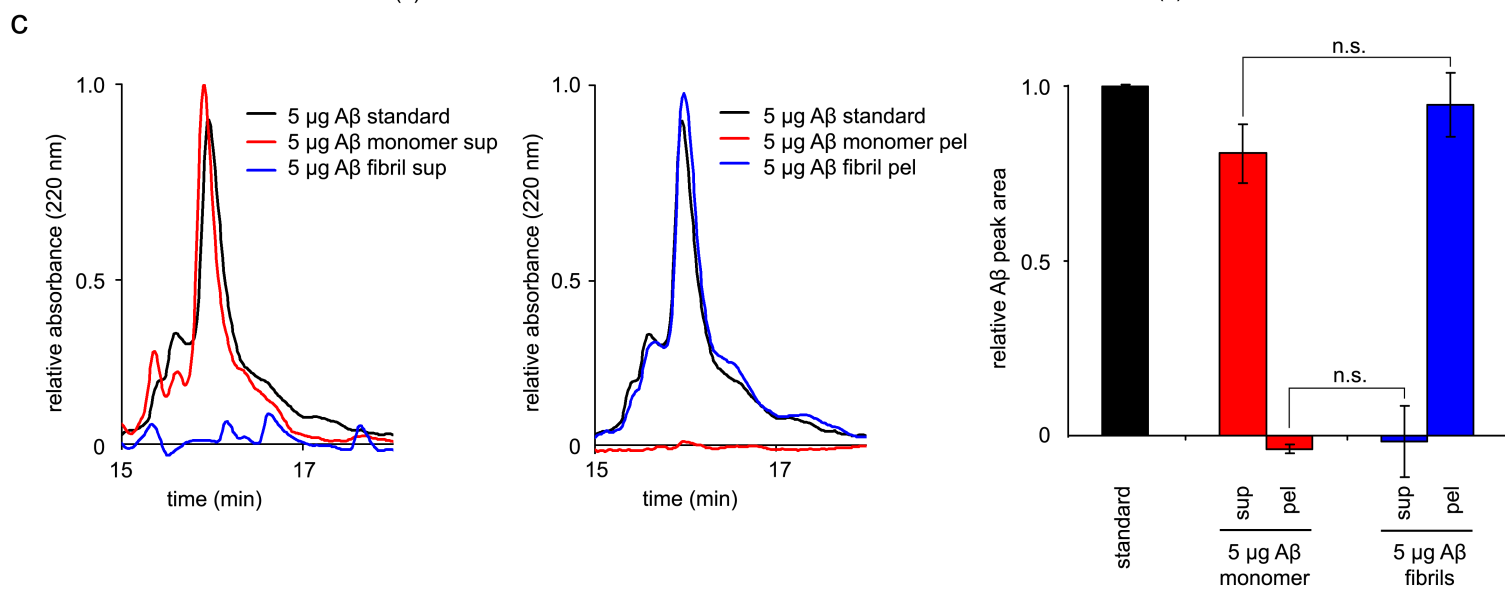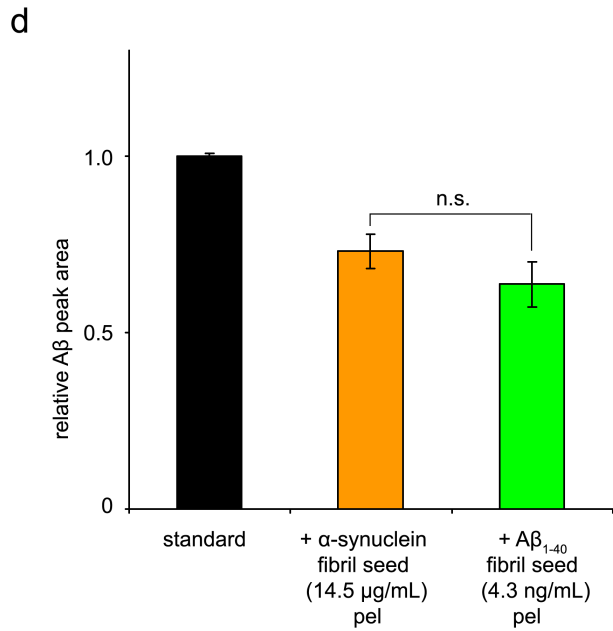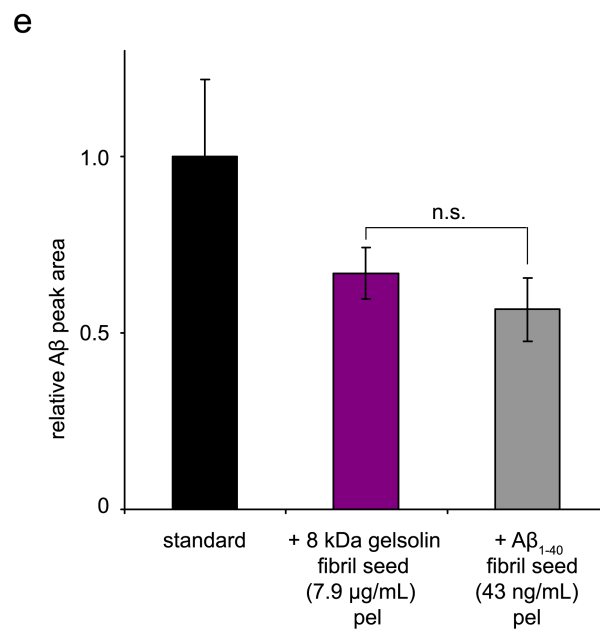

Figure S3

PK : mouse brain  
total protein (w/w)    0   0.01:1   0.002:1

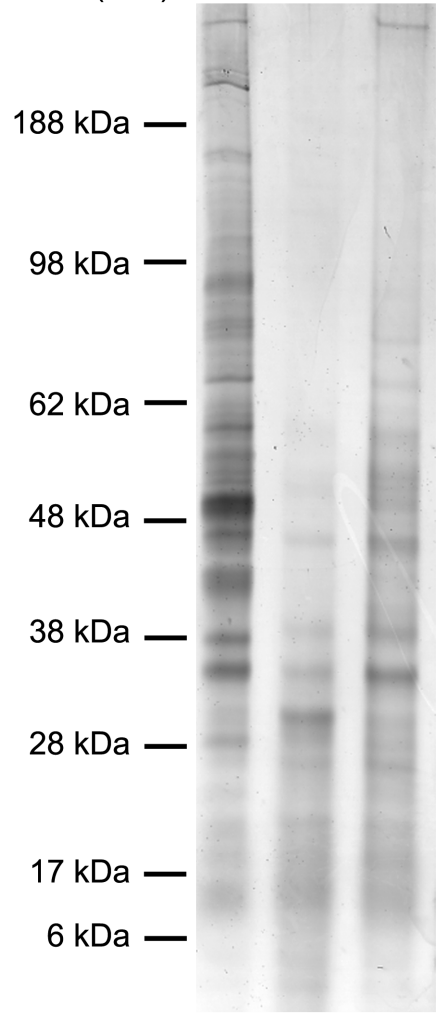

a

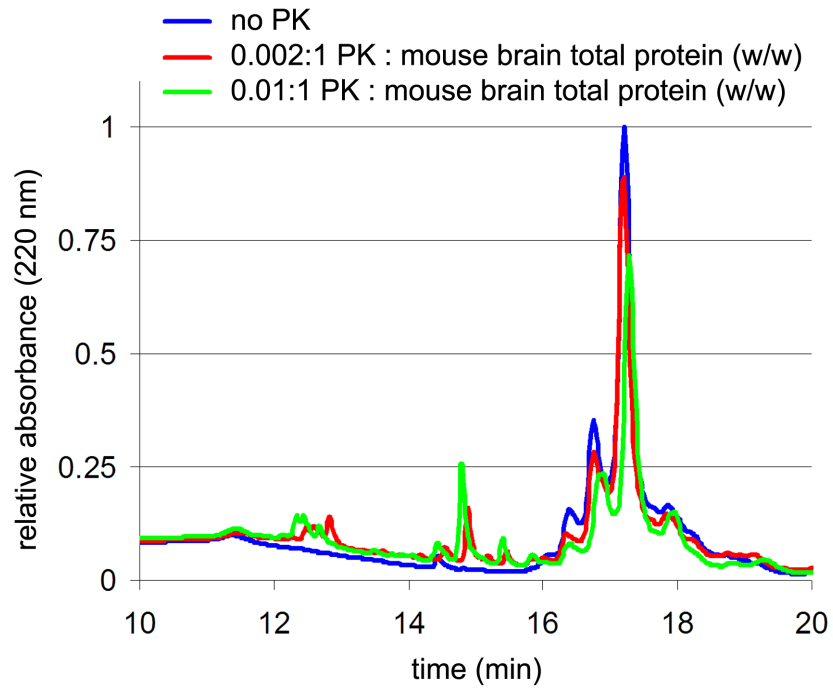

b

| sample                                       | relative A $\beta$ peak area<br>(16 min – 18 min) |
|----------------------------------------------|---------------------------------------------------|
| no PK                                        | 1.0                                               |
| 0.002:1 PK : mouse brain total protein (w/w) | 0.84                                              |
| 0.01:1 PK : mouse brain total protein (w/w)  | 0.68                                              |

Figure S5

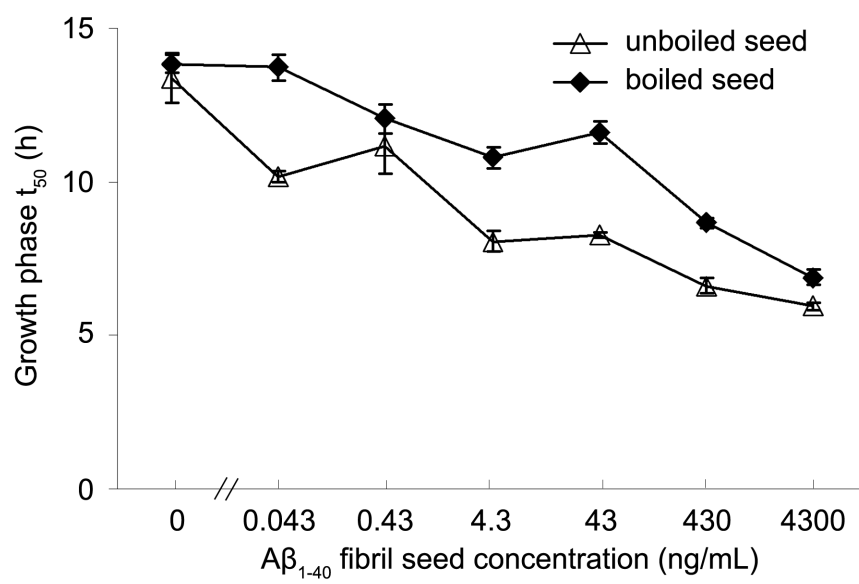

Figure S6

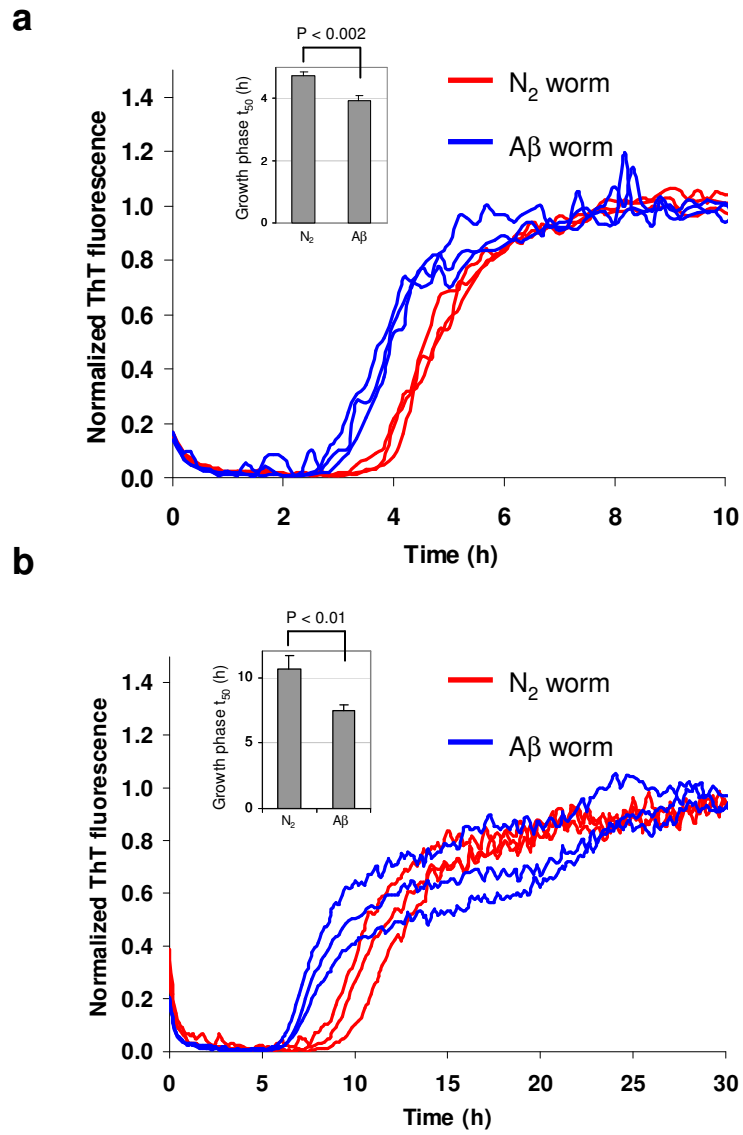

Figure S7

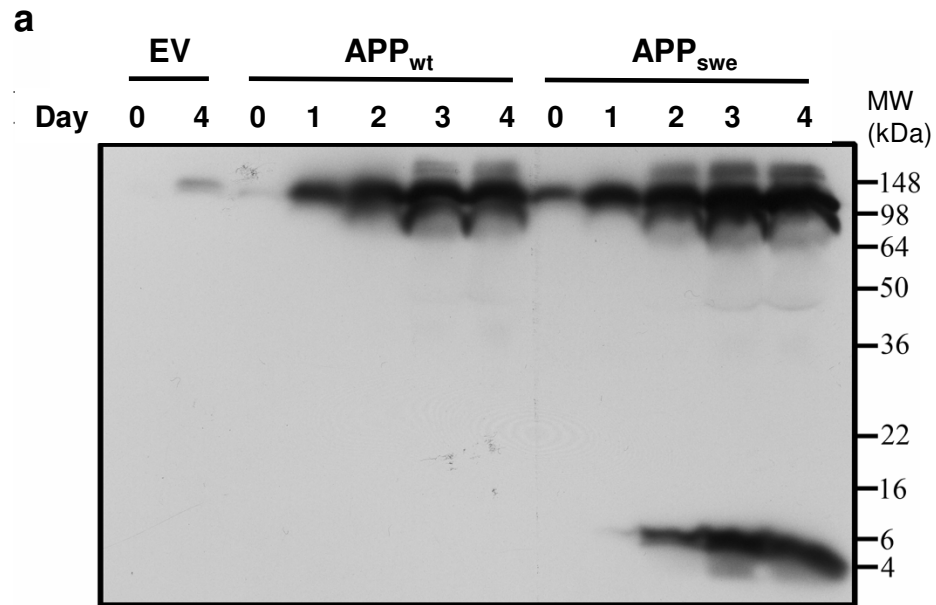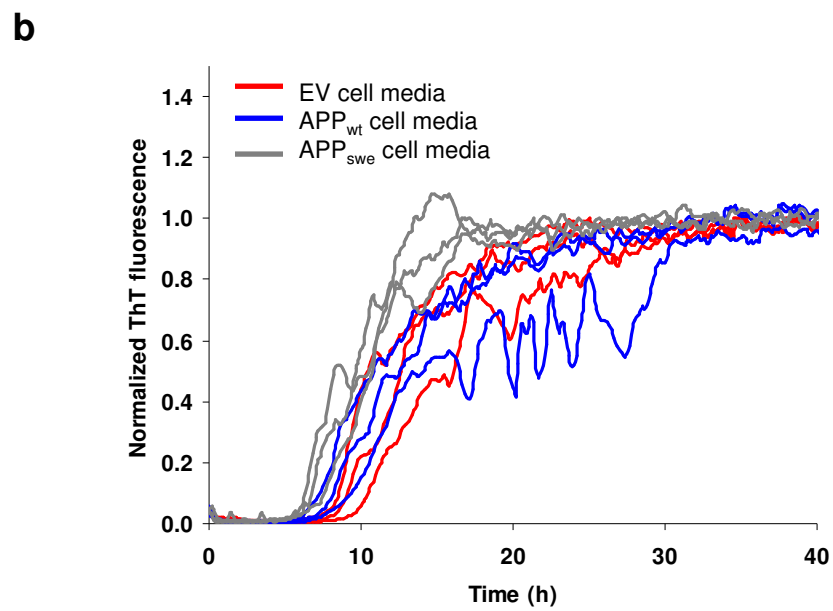

Figure S8

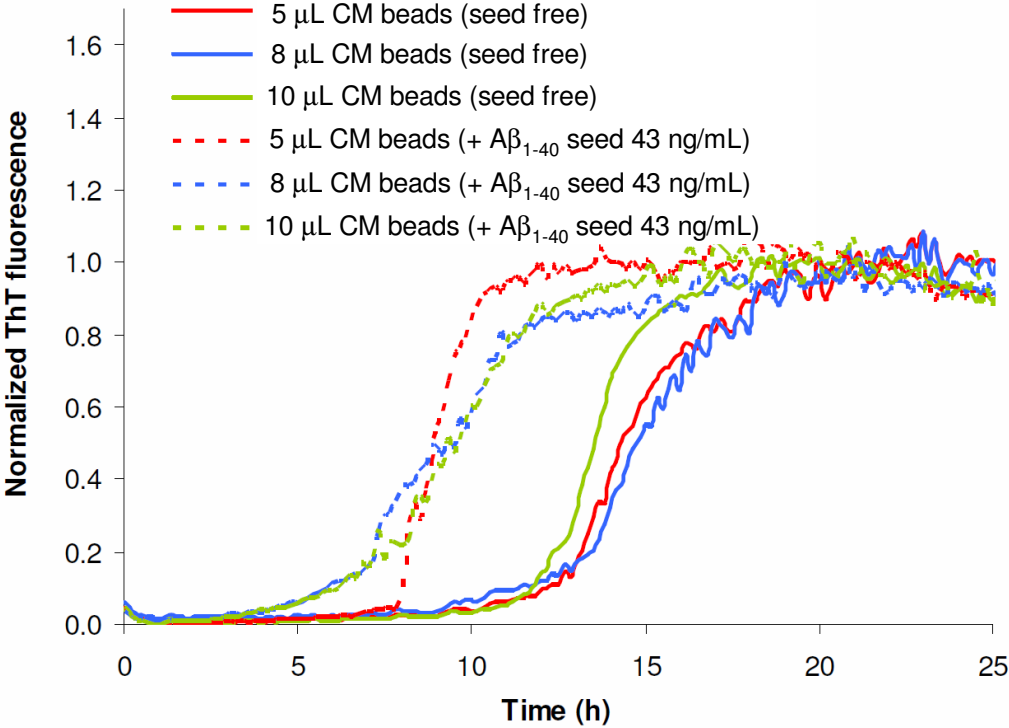

Supplement: NIHMS268352-supplement-2_si_002.pdf [file NIHMS268352-supplement-2_si_002.pdf]
